# Supplementary material
Source: MDPI journal article supplement (https://www.mdpi.com/2071-1050/8/5/425)
Supplement: s1 [file s1]

# Supplementary Materials: The Influencing Factors of Enterprise Sustainable Innovation: An Empirical Study

Si-Hua Chen

## Supplementary 1. Enterprise Sustainable Innovation Factors Questionnaire

Dear Sir/Madam:

Hello!

First of all, thank you very much for taking the time to fill in this questionnaire!

We are doing a research project on “Enterprise Sustainable innovation factors”. Through your answers to the following questions, it can help us in-depth study of factors affecting enterprise sustainable innovation. We assure you: This survey results for research purposes only and strictly confidential. Please fill in your enterprise information according to the actual situation.

Thank you for your support and cooperation!

Jiangxi University of Finance and Economics

### Questionnaire

| According to the actual condition, please play “√” in the appropriate option. Fully in line with (the highest) of 5 points, the total not comply with (minimum) for 1 point and so on. | Greatly                    | To Relatively Large Degree | To Some Degree             | To a Small Degree          | Not at All                 |
|----------------------------------------------------------------------------------------------------------------------------------------------------------------------------------------|----------------------------|----------------------------|----------------------------|----------------------------|----------------------------|
| <b>Knowledge Learning Capability</b>                                                                                                                                                   |                            |                            |                            |                            |                            |
| high degree of Information                                                                                                                                                             | <input type="checkbox"/> 5 | <input type="checkbox"/> 4 | <input type="checkbox"/> 3 | <input type="checkbox"/> 2 | <input type="checkbox"/> 1 |
| employees often use the information platform to do their jobs                                                                                                                          | <input type="checkbox"/> 5 | <input type="checkbox"/> 4 | <input type="checkbox"/> 3 | <input type="checkbox"/> 2 | <input type="checkbox"/> 1 |
| the information platform is well managed                                                                                                                                               | <input type="checkbox"/> 5 | <input type="checkbox"/> 4 | <input type="checkbox"/> 3 | <input type="checkbox"/> 2 | <input type="checkbox"/> 1 |
| the employees have high R&D capability                                                                                                                                                 | <input type="checkbox"/> 5 | <input type="checkbox"/> 4 | <input type="checkbox"/> 3 | <input type="checkbox"/> 2 | <input type="checkbox"/> 1 |
| <b>Knowledge Creation Capability</b>                                                                                                                                                   |                            |                            |                            |                            |                            |
| enterprise has applied many important patents                                                                                                                                          | <input type="checkbox"/> 5 | <input type="checkbox"/> 4 | <input type="checkbox"/> 3 | <input type="checkbox"/> 2 | <input type="checkbox"/> 1 |
| enterprise has great R&D input                                                                                                                                                         | <input type="checkbox"/> 5 | <input type="checkbox"/> 4 | <input type="checkbox"/> 3 | <input type="checkbox"/> 2 | <input type="checkbox"/> 1 |
| enterprise has high R&D risk                                                                                                                                                           | <input type="checkbox"/> 5 | <input type="checkbox"/> 4 | <input type="checkbox"/> 3 | <input type="checkbox"/> 2 | <input type="checkbox"/> 1 |
| <b>Production Equipment Level</b>                                                                                                                                                      |                            |                            |                            |                            |                            |
| the production equipment is advanced                                                                                                                                                   | <input type="checkbox"/> 5 | <input type="checkbox"/> 4 | <input type="checkbox"/> 3 | <input type="checkbox"/> 2 | <input type="checkbox"/> 1 |
| <b>Knowledge Transferring Capability</b>                                                                                                                                               |                            |                            |                            |                            |                            |
| enterprise has influential brand                                                                                                                                                       | <input type="checkbox"/> 5 | <input type="checkbox"/> 4 | <input type="checkbox"/> 3 | <input type="checkbox"/> 2 | <input type="checkbox"/> 1 |
| enterprise is good at utilizing technology                                                                                                                                             | <input type="checkbox"/> 5 | <input type="checkbox"/> 4 | <input type="checkbox"/> 3 | <input type="checkbox"/> 2 | <input type="checkbox"/> 1 |
| the production managers have high quality                                                                                                                                              | <input type="checkbox"/> 5 | <input type="checkbox"/> 4 | <input type="checkbox"/> 3 | <input type="checkbox"/> 2 | <input type="checkbox"/> 1 |

| Profit-Making Capability                                        |                            |                            |                            |                            |                            |
|-----------------------------------------------------------------|----------------------------|----------------------------|----------------------------|----------------------------|----------------------------|
| the profits increase quickly                                    | <input type="checkbox"/> 5 | <input type="checkbox"/> 4 | <input type="checkbox"/> 3 | <input type="checkbox"/> 2 | <input type="checkbox"/> 1 |
| new products are important growth engines of enterprise profits | <input type="checkbox"/> 5 | <input type="checkbox"/> 4 | <input type="checkbox"/> 3 | <input type="checkbox"/> 2 | <input type="checkbox"/> 1 |
| Marketing Capability                                            |                            |                            |                            |                            |                            |
| enterprise has advanced market network                          | <input type="checkbox"/> 5 | <input type="checkbox"/> 4 | <input type="checkbox"/> 3 | <input type="checkbox"/> 2 | <input type="checkbox"/> 1 |
| sales people of the enterprise has high capability              | <input type="checkbox"/> 5 | <input type="checkbox"/> 4 | <input type="checkbox"/> 3 | <input type="checkbox"/> 2 | <input type="checkbox"/> 1 |
| Sustainable Innovation Capability                               |                            |                            |                            |                            |                            |
| enterprise has high knowledge innovation capability             | <input type="checkbox"/> 5 | <input type="checkbox"/> 4 | <input type="checkbox"/> 3 | <input type="checkbox"/> 2 | <input type="checkbox"/> 1 |
| enterprise has high production innovation capability            | <input type="checkbox"/> 5 | <input type="checkbox"/> 4 | <input type="checkbox"/> 3 | <input type="checkbox"/> 2 | <input type="checkbox"/> 1 |
| enterprise has high market innovation capability                | <input type="checkbox"/> 5 | <input type="checkbox"/> 4 | <input type="checkbox"/> 3 | <input type="checkbox"/> 2 | <input type="checkbox"/> 1 |

### Supplementary 2. The Equation of System Dynamics Model

1. Enterprise capability = INTEG (The sustainable innovation capability, 300).
2. Expenditure input = employee salary + hardware purchase + training cost.
3. Knowledge collecting capability = (information platform management + information platform use) \* degree of Information.
4. Knowledge creation capability = expenditure input \* "R&D employee capability" \* risk factors + number of patent.
5. Knowledge innovation capability = knowledge learning capability + knowledge creation capability - Knowledge level.
6. Knowledge learning capability = knowledge collecting capability + "R&D employee capability".
7. Knowledge level = INTEG (Knowledge innovation capability, 100).
8. Knowledge transferring capability = the number of brands + the capability of production knowledge employees \* transferring risk.
9. Market innovation capability = marketing capability + "profit-making capability" - Market level  
Market level = INTEG (Market innovation capability, 100).
10. Marketing capability = marketing employee capability \* marketing network.
11. marketing employee capability =  $\sum$  number of marketing staff with education below bachelor degree \* 0.5 \* "working years of R&D staff" \* "R&D motivation level" +  $\sum$  number of marketing staff with bachelor degree \* 1 \* "working years of R&D staff" \* "R&D motivation level" +  $\sum$  number of marketing staff with master degree \* 1.5 \* "working years of R&D staff" \* "R&D motivation level" +  $\sum$  number of marketing staff with doctoral degree \* 2 \* "working years of R&D staff" \* "R&D motivation level".
12. Production innovation capability = equipment level + knowledge transferring capability - Production level.
13. Production level = INTEG (Production innovation capability, 100).
14. "profit-making capability" = profits increase + sales revenue of new products.
15. "R&D employee capability" =  $\sum$  number of R&D staff with education below bachelor degree \* 0.5 \* "R&D motivation level" \* "working years of R&D staff" +  $\sum$  number of R&D staff with bachelor degree \* 1 \* "R&D motivation level" \* "working years of R&D staff" +  $\sum$  number of R&D staff with master degree \* 1.5 \* "R&D motivation level" \* "working years of R&D staff" +  $\sum$  number of R&D staff with doctoral degree \* 2 \* "R&D motivation level" \* "working years of R&D staff".
16. the capability of production knowledge employees =  $\sum$  number of production knowledge staff with education below bachelor degree \* 0.5 \* "working years of production knowledge employees" \* "motivation level of production knowledge employees" +  $\sum$  number of production

knowledge staff with bachelor degree \*1\*working years of production knowledge employees\*\*motivation level of production knowledge employees"+∑number of production knowledge staff with master degree \*1.5\*working years of production knowledge employees\*\*motivation level of production knowledge employees"+∑number of production knowledge staff with doctoral degree \*2\*working years of production knowledge employees\*\*motivation level of production knowledge employees".

17. The sustainable innovation capability = Knowledge innovation capability +Market innovation.
18. Capability + Production innovation capability-Enterprise capability.
19. Training cost = training frequency\*input intensity.
